# Supplementary material for: A New X-ray Diffraction Spectrum-Based Untargeted Strategy for Accurately Identifying Ancient Painted Pottery from Various Dynasties and Locations in China
Source: MDPI journal article supplement (doi:10.3390/chemosensors12040064), 2024-04-15
Supplement: s1 [file s1]

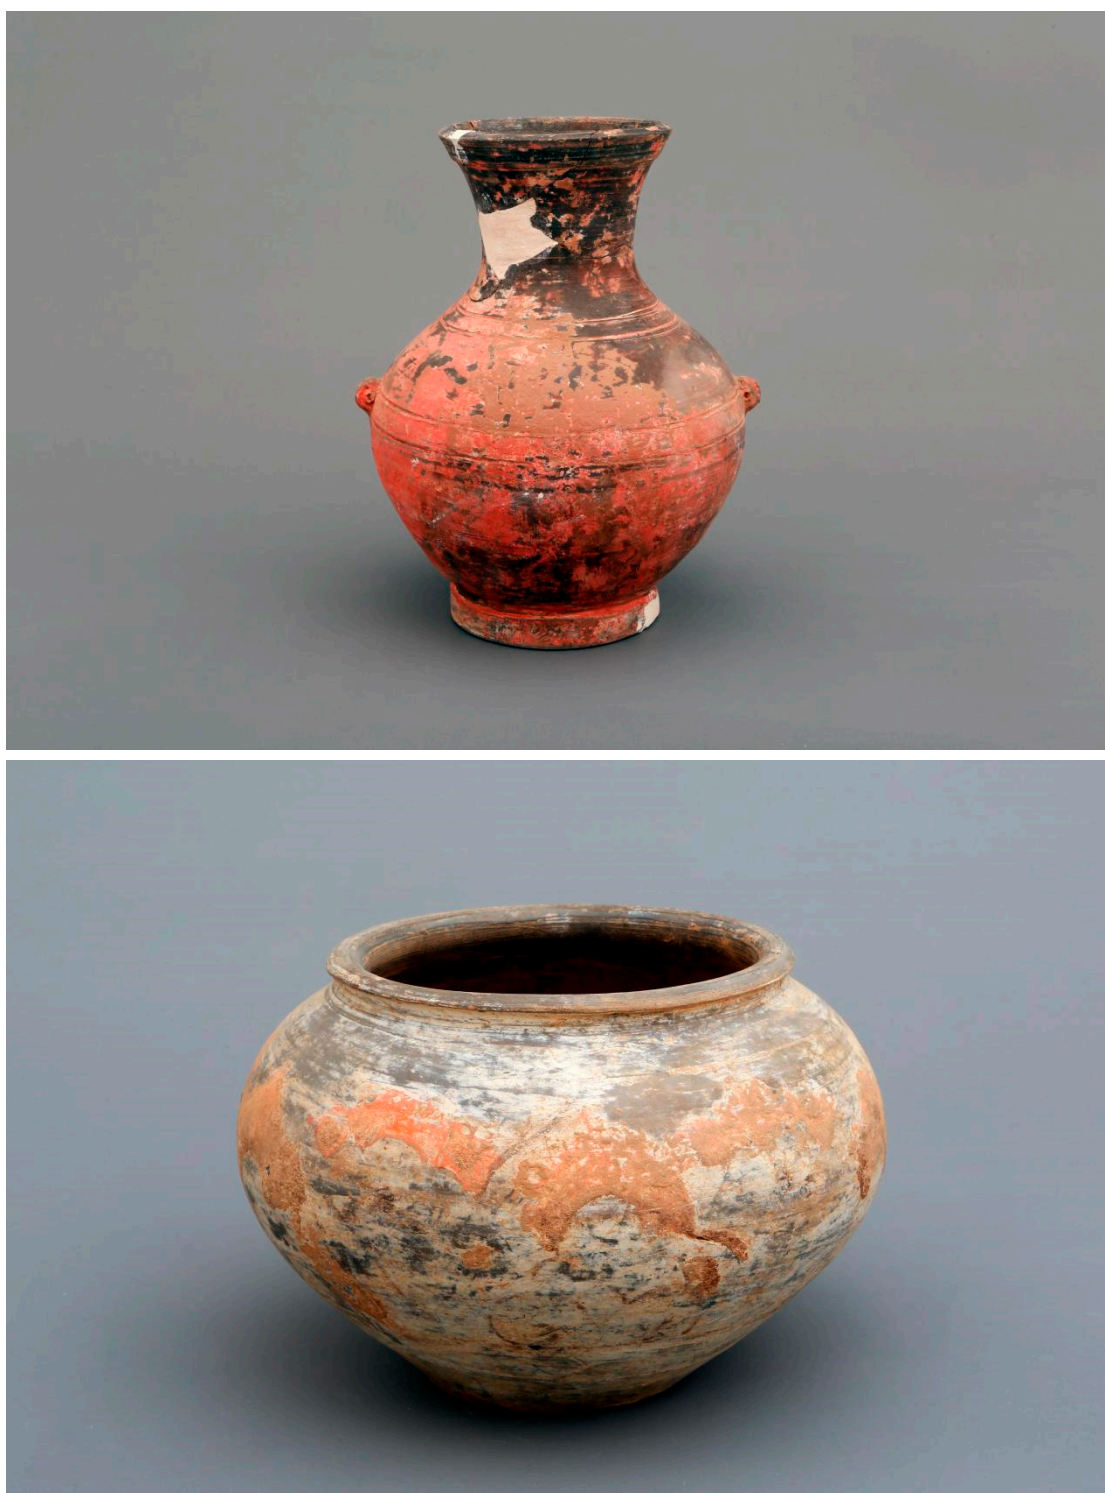

**Figure S1.** Typical potteries collected in this work. The upper plot is a red pottery, where as the lower one is a white pottery.
