# Supplementary material for: A New X-ray Diffraction Spectrum-Based Untargeted Strategy for Accurately Identifying Ancient Painted Pottery from Various Dynasties and Locations in China
Source: MDPI journal article supplement (doi:10.3390/chemosensors12040064), 2024-04-15
Supplement: s1 [file s1]

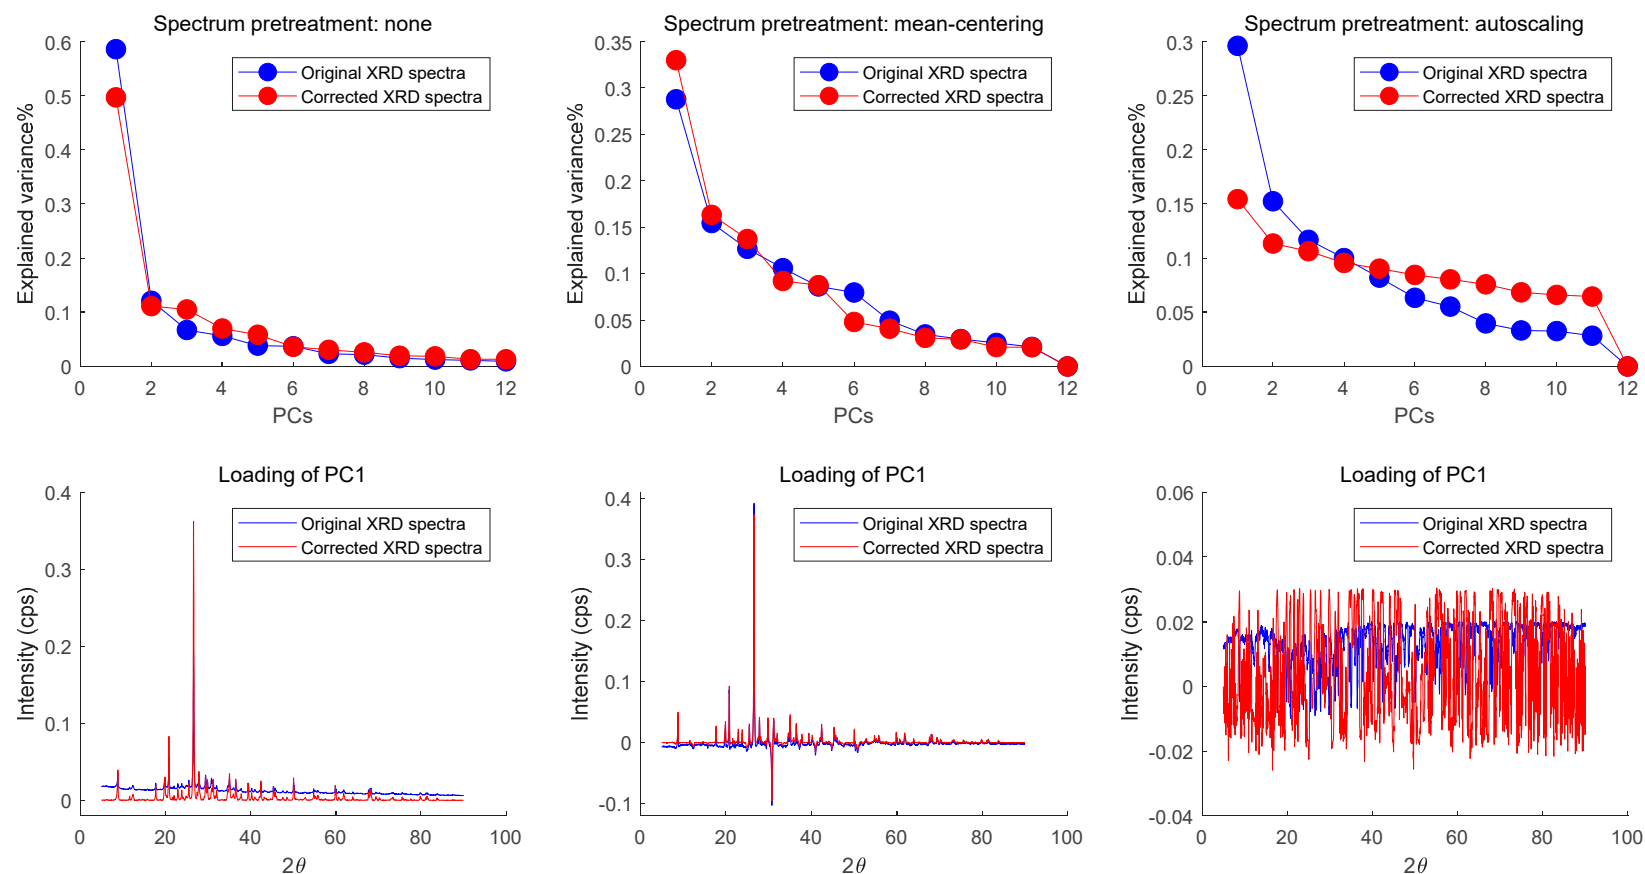

**Figure S4.** Variance and loading from XRD spectra of white pottery with and without baseline-drift correction. First row show variance explained by PCs. Second row show loading plot corresponding to the PC1. Left, middle, and right columns were spectra untreated, mean-centering, and autoscaling, respectively.
