# Supplementary material for: A New X-ray Diffraction Spectrum-Based Untargeted Strategy for Accurately Identifying Ancient Painted Pottery from Various Dynasties and Locations in China
Source: MDPI journal article supplement (doi:10.3390/chemosensors12040064), 2024-04-15
Supplement: s1 [file s1]

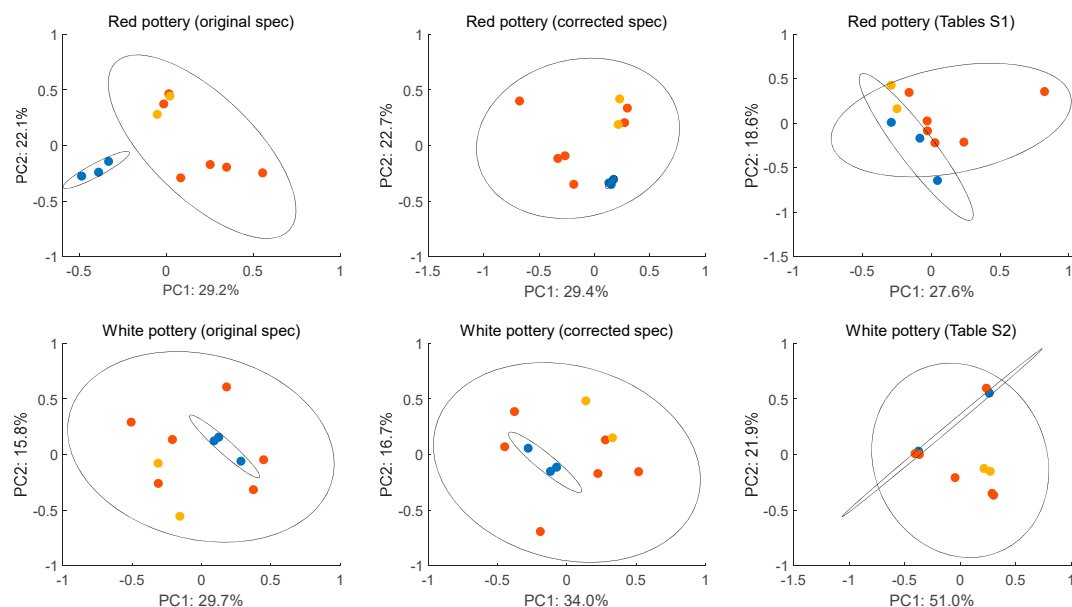

**Figure S5.** Sample clustering based on PCA. Left column: clustering of potteries based on original XRD spectra (mean-centering treatment). Middle column: clustering of potteries based on original XRD spectra (mean-centering treatment). Right column: clustering of potteries based on data of Table S1 and S2. Autoscaling treatment was employed for the data of Table S1 and S2. Blue circles represent samples from the Guyuan city of the Han dynasty. Red circles are samples from the Zhongwei city of the Han dynasty. Yellow circles is samples from the Zhongwei city of the Tang Dynasty.
