# Supplementary figures and images for: A New X-ray Diffraction Spectrum-Based Untargeted Strategy for Accurately Identifying Ancient Painted Pottery from Various Dynasties and Locations in China
Source: MDPI journal article supplement (doi:10.3390/chemosensors12040064), 2024-04-15

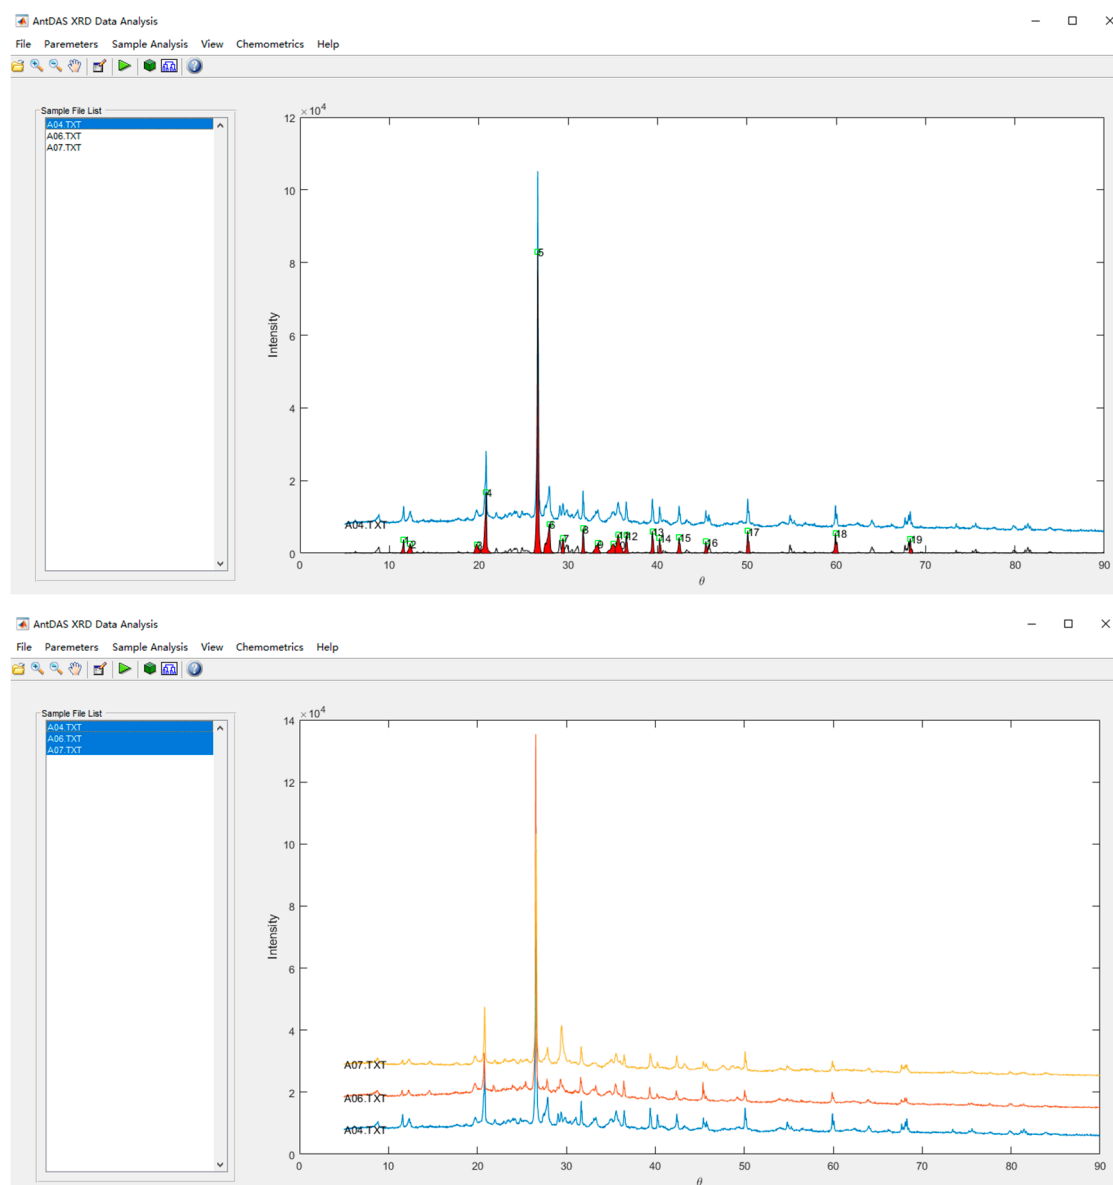

**Figure S2.** Matlab GUI of AntDAS-XRD.

Supplement: s1 [file s1]
